# Supplementary material for: Predialysis anemia management and outcomes following dialysis initiation: A retrospective cohort analysis
Source: PubMed Central journal article supplement (PMC6157862; doi:10.1371/journal.pone.0203767), 2018-09-26
Supplement: pone.0203767.s002.pdf [file pone.0203767.s002.pdf]

**Table S1.** Codes used to determine use of red blood cell transfusions and erythropoiesis

stimulating agents

| <b>Anemia Treatment</b> | <b>Codes</b>                                                                                                                                                                                                                                                                                                                                                                                                                                                                                                                                                                                                                                                                                                                                                                                                                                                                                                                                                                                                                                                                                                                                                                                                                                                                                                                                                                                                                                                                                                                                                                                                                                                                                                                                                                                                                                                                                                                                                                                                                                                                                                                                                 | <b>Sources of Claims</b>     |
|-------------------------|--------------------------------------------------------------------------------------------------------------------------------------------------------------------------------------------------------------------------------------------------------------------------------------------------------------------------------------------------------------------------------------------------------------------------------------------------------------------------------------------------------------------------------------------------------------------------------------------------------------------------------------------------------------------------------------------------------------------------------------------------------------------------------------------------------------------------------------------------------------------------------------------------------------------------------------------------------------------------------------------------------------------------------------------------------------------------------------------------------------------------------------------------------------------------------------------------------------------------------------------------------------------------------------------------------------------------------------------------------------------------------------------------------------------------------------------------------------------------------------------------------------------------------------------------------------------------------------------------------------------------------------------------------------------------------------------------------------------------------------------------------------------------------------------------------------------------------------------------------------------------------------------------------------------------------------------------------------------------------------------------------------------------------------------------------------------------------------------------------------------------------------------------------------|------------------------------|
| Transfusions            | IP/SN/OP revenue: 0380, 0381, 0382, 0391<br>IP/SN/OP value: 37<br>IP/SN/OP procedure: 99.03, 99.04<br>IP/SN/OP HCPCS/CPT: P9010, P9011, P9016, P9021, P9022, P9038, P9039, P9040, P9051, P9054, P9056, P9057, P9058, 36430                                                                                                                                                                                                                                                                                                                                                                                                                                                                                                                                                                                                                                                                                                                                                                                                                                                                                                                                                                                                                                                                                                                                                                                                                                                                                                                                                                                                                                                                                                                                                                                                                                                                                                                                                                                                                                                                                                                                   | Medicare Parts A/B: IP/SN/OP |
| EPO/DPO/PEG             | EPO, HCPCS: J0885, J0886, Q4081, Q0136, Q4055; Revenue Center Code 0634 or 0635<br>DPO, HCPCS: C1774, J0880, Q4054, Q0137, J0881, J0882<br>PEG, HCPCS: Q2047, J0890                                                                                                                                                                                                                                                                                                                                                                                                                                                                                                                                                                                                                                                                                                                                                                                                                                                                                                                                                                                                                                                                                                                                                                                                                                                                                                                                                                                                                                                                                                                                                                                                                                                                                                                                                                                                                                                                                                                                                                                          | Medicare Parts A/B: IP/SN/OP |
| EPO/DPO/PEG             | NDC codes for EPO:<br>00062030302, 00062030402, 00062031002, 00062740003, 00062740103, 00062740201, 00062740501, 54569313700, 54868252300, 54868252301, 54868542800, 54868542900, 54868567300, 54868567301, 54868580200, 54868586700, 55513000201, 55513000204, 55513000301, 55513000304, 55513000401, 55513000404, 55513000501, 55513000504, 55513000601, 55513001001, 55513001004, 55513001101, 55513001104, 55513001201, 55513001204, 55513001301, 55513001304, 55513001401, 55513001404, 55513001501, 55513002101, 55513002104, 55513002301, 55513002304, 55513002501, 55513002504, 55513002701, 55513002704, 55513002801, 55513003201, 55513003701, 55513003704, 55513003901, 55513003904, 55513004101, 55513004104, 55513004301, 55513004304, 55513004401, 55513004601, 55513004801, 55513005301, 55513005304, 55513005401, 55513005404, 55513005701, 55513005704, 55513005801, 55513005804, 55513009001, 55513009101, 55513009201, 55513009301, 55513009401, 55513009501, 55513009601, 55513009701, 55513009801, 55513009804, 55513011001, 55513011101, 55513012601, 55513012610, 55513014401, 55513014410, 55513014801, 55513014810, 55513026701, 55513026710, 55513028301, 55513028310, 55513047801, 55513047810, 55513082301, 55513082310, 59676030200, 59676030201, 59676030202, 59676030300, 59676030301, 59676030302, 59676030400, 59676030401, 59676030402, 59676031000, 59676031001, 59676031002, 59676031200, 59676031201, 59676031204, 59676032000, 59676032001, 59676032004, 59676034000, 59676034001<br><br>NDC codes for DPO<br>54868542800, 54868542900, 54868586700, 55513000201, 55513000204, 55513000301, 55513000304, 55513000401, 55513000404, 55513000501, 55513000504, 55513000601, 55513001001, 55513001004, 55513001101, 55513001104, 55513001201, 55513001204, 55513001301, 55513001304, 55513001401, 55513001404, 55513001501, 55513002101, 55513002104, 55513002301, 55513002304, 55513002501, 55513002504, 55513002701, 55513002704, 55513002801, 55513003201, 55513003701, 55513003704, 55513003901, 55513003904, 55513004101, 55513004104, 55513004301, 55513004304, 55513004401, 55513004601, 55513004801, 55513005301, | Medicare Part D              |

55513005304, 55513005401, 55513005404, 55513005701, 55513005704,  
55513005801, 55513005804, 55513009001, 55513009101, 55513009201,  
55513009301, 55513009401, 55513009501, 55513009601, 55513009701,  
55513009801, 55513009804, 55513011001, 55513011101

NDC codes for PEG:  
64764061010, 64764062020

---

DPO, darbepoetin alfa; EPO, erythropoietin alfa; HCPCS, Healthcare Common Procedure

Coding System; IP, inpatient; NDC, National Drug Code; OP, outpatient; PEG, peginesatide;

SN, skilled nursing.
