# Supplementary material for: Predialysis anemia management and outcomes following dialysis initiation: A retrospective cohort analysis
Source: PubMed Central journal article supplement (PMC6157862; doi:10.1371/journal.pone.0203767), 2018-09-26
Supplement: pone.0203767.s003.pdf [file pone.0203767.s003.pdf]

**Table S2.** ICD-9-CM diagnosis and HCPCS codes used to identify baseline comorbid conditions

| <b>Conditions</b> | <b>ICD-9-CM Diagnosis and HCPCS Codes</b>        | <b>ICD-9-CM V-Codes</b> |
|-------------------|--------------------------------------------------|-------------------------|
| ASHD              | 410-414                                          | V45.81; V45.82          |
| CHF               | 398.91;422; 425; 428; 402.X1; 404.x1; 404.x3     | V42.1                   |
| CVA/TIA           | 430-438                                          |                         |
| PVD               | 440-444; 447; 451-453; 557                       |                         |
| Dysrhythmia       | 426-427                                          | V45.0; V53.3            |
| Cardiac (other)   | 420-421;423-424; 429; 785.0-785.3                | V42.2; V43.3            |
| COPD              | 491-494; 496; 510                                |                         |
| GI                | 456.0-456.2; 530.7; 531-534; 569.84; 569.85; 578 |                         |
| Liver disease     | 570; 571; 572.1; 572.4; 573.1-573.3              | V42.7                   |
| Cancer            | 140-172; 174-208; 230-231; 233-234               |                         |
| Diabetes          | 250; 357.2; 362.0x; 366.41                       |                         |

ASHD, atherosclerotic heart disease; CHF, congestive heart disease; COPD, chronic obstructive pulmonary disease; CVA/TIA, cerebrovascular accident/transient ischemic attack; GI, gastrointestinal; HCPCS, Healthcare Common Procedure Coding System; ICD-9-CM, International Classification of Diseases, Ninth Revision, Clinical Modification; PVD, peripheral vascular disease.
