# Supplementary material for: Predialysis anemia management and outcomes following dialysis initiation: A retrospective cohort analysis
Source: PubMed Central journal article supplement (PMC6157862; doi:10.1371/journal.pone.0203767), 2018-09-26
Supplement: pone.0203767.s004.pdf [file pone.0203767.s004.pdf]

**Table S3.** Baseline characteristics and comorbidity by study group, 10.0 g/dL hemoglobin threshold

|                                                 | All           | Group 1       | Group 2      | Group 3       | Group 4       | <i>P</i> |
|-------------------------------------------------|---------------|---------------|--------------|---------------|---------------|----------|
| <i>n</i>                                        | 14,117        | 1360          | 2049         | 9737          | 971           |          |
| Mean hemoglobin at initiation (SD), g/dL        | 9.45 (1.30)   | 11.60 (1.15)  | 10.83 (0.74) | 8.87 (0.86)   | 9.35 (0.57)   | < 0.0001 |
| Mean age (SD), yr.                              | 76.60 (6.78)  | 76.02 (6.44)  | 77.40 (6.77) | 76.54 (6.81)  | 76.38 (6.83)  | < 0.0001 |
| Age group                                       | <i>n</i>      | %             | %            | %             | %             | < 0.0001 |
| 66-69                                           | 2931          | 22.2          | 16.5         | 21.3          | 21.9          |          |
| 70-74                                           | 3442          | 25.1          | 23.6         | 24.4          | 24.9          |          |
| 75-79                                           | 3275          | 22.6          | 25.0         | 22.9          | 22.8          |          |
| ≥ 80                                            | 4469          | 30.1          | 34.9         | 31.3          | 30.4          |          |
| Sex                                             | <i>n</i>      | %             | %            | %             | %             | < 0.0001 |
| Male                                            | 7569          | 70.5          | 48.5         | 52.4          | 52.7          |          |
| Female                                          | 6548          | 29.5          | 51.5         | 47.6          | 47.3          |          |
| Race                                            | N             | %             | %            | %             | %             | < 0.0001 |
| White                                           | 10463         | 84.6          | 76.0         | 72.8          | 68.6          |          |
| Black                                           | 2923          | 11.7          | 18.0         | 22.0          | 26.7          |          |
| Other                                           | 731           | 3.7           | 6.1          | 5.3           | 4.7           |          |
| Primary cause of ESRD                           | <i>n</i>      | %             | %            | %             | %             | < 0.0001 |
| Diabetes                                        | 6329          | 46.2          | 46.1         | 44.9          | 39.4          |          |
| Hypertension                                    | 5249          | 36.0          | 38.5         | 37.2          | 36.4          |          |
| Glomerulonephritis                              | 657           | 3.5           | 4.5          | 4.7           | 5.9           |          |
| Other                                           | 1882          | 14.4          | 10.9         | 13.2          | 18.3          |          |
| Mean total baseline hospitalization days (SD)   | 13.09 (17.49) | 10.34 (16.73) | 9.75 (13.89) | 13.40 (17.38) | 20.93 (22.97) | < 0.0001 |
| Length of total baseline hospitalizations, days | <i>n</i>      | %             | %            | %             | %             | < 0.0001 |
| 0                                               | 3930          | 37.4          | 34.1         | 26.0          | 19.4          |          |
| 1-3                                             | 949           | 6.0           | 8.4          | 6.7           | 4.2           |          |
| > 3                                             | 9238          | 56.5          | 57.4         | 67.3          | 76.4          |          |
| Comorbid conditions                             | <i>n</i>      | %             | %            | %             | %             |          |
| Diabetes                                        | 10096         | 70.8          | 69.2         | 72.0          | 72.3          | 0.0353   |
| ASHD                                            | 8785          | 64.4          | 60.0         | 61.8          | 68.2          | < 0.0001 |
| CHF                                             | 9374          | 65.6          | 61.8         | 66.8          | 73.3          | < 0.0001 |
| CVA/TIA                                         | 3744          | 22.9          | 26.3         | 26.5          | 33.0          | < 0.0001 |
| PVD                                             | 6505          | 42.1          | 45.4         | 46.1          | 52.7          | < 0.0001 |
| Dysrhythmia                                     | 6681          | 50.1          | 42.5         | 47.3          | 54.2          | < 0.0001 |
| Cardiac (other)                                 | 7394          | 50.4          | 48.9         | 52.6          | 60.1          | < 0.0001 |
| COPD                                            | 5172          | 38.5          | 33.3         | 36.5          | 42.2          | < 0.0001 |
| GI                                              | 1582          | 6.0           | 9.5          | 11.6          | 18.0          | < 0.0001 |
| Liver disease                                   | 1187          | 6.5           | 7.8          | 8.4           | 12.5          | < 0.0001 |
| Cancer                                          | 2546          | 15.0          | 17.7         | 18.0          | 23.4          | 0.0005   |

ASHD, atherosclerotic heart disease; CHF, congestive heart disease; COPD, chronic obstructive pulmonary disease; CVA/TIA, cerebrovascular accident/transient ischemic attack; ESRD, end-stage renal disease; GI, gastrointestinal; PVD, peripheral vascular disease.
