# Supplementary material for: Predialysis anemia management and outcomes following dialysis initiation: A retrospective cohort analysis
Source: PubMed Central journal article supplement (PMC6157862; doi:10.1371/journal.pone.0203767), 2018-09-26
Supplement: pone.0203767.s005.pdf [file pone.0203767.s005.pdf]

**Table S4.** Unadjusted rates, per 100-patient-years, of mortality and hospitalization, hemoglobin threshold 9 g/dL

| Outcomes, Time after<br>Dialysis Initiation* | Unadjusted Rate (95% CI)                    |                                       |
|----------------------------------------------|---------------------------------------------|---------------------------------------|
|                                              | ESA Treatment                               |                                       |
|                                              | Before and after<br>Hemodialysis Initiation | Only after<br>Hemodialysis Initiation |
| <i>n</i>                                     | 3662                                        | 4461                                  |
| All-cause death                              |                                             |                                       |
| 3                                            | 20.3 (17.2-23.3)                            | 28.0 (24.8-31.2)                      |
| 6                                            | 19.4 (17.2-21.6)                            | 25.8 (23.5-28.1)                      |
| 12                                           | 18.9 (17.2-20.6)                            | 23.8 (22.0-25.6)                      |
| CV-related death                             |                                             |                                       |
| 3                                            | 7.7 (5.8-9.5)                               | 11.3 (9.3-13.4)                       |
| 6                                            | 7.4 (6.1-8.7)                               | 10.7 (9.2-12.2)                       |
| 12                                           | 7.4 (6.3-8.4)                               | 10.0 (8.8-11.1)                       |
| All-cause hospitalizations†                  |                                             |                                       |
| 3                                            | 172.1 (163.1-181.0)                         | 197.0 (188.2-205.7)                   |
| 6                                            | 170.2 (163.7-176.8)                         | 186.7 (180.4-193.1)                   |
| 12                                           | 163.5 (158.4-168.6)                         | 176.8 (171.8-181.8)                   |
| CV-related hospitalizations†                 |                                             |                                       |
| 3                                            | 48.3 (43.6-53.0)                            | 55.5 (51.0-60.1)                      |
| 6                                            | 49.0 (45.6-52.5)                            | 50.5 (47.3-53.8)                      |
| 12                                           | 47.3 (44.6-50.1)                            | 48.8 (46.2-51.4)                      |

\*Months after 90 days from dialysis initiation.

†Multiple hospitalizations.

CI, confidence interval; CV, cardiovascular; ESAs, erythropoiesis-stimulating agents.
