# Supplementary material for: Predialysis anemia management and outcomes following dialysis initiation: A retrospective cohort analysis
Source: PubMed Central journal article supplement (PMC6157862; doi:10.1371/journal.pone.0203767), 2018-09-26
Supplement: pone.0203767.s006.pdf [file pone.0203767.s006.pdf]

**Table S5.** All-cause and cardiovascular mortality at 3, 6, and 12 months after hemodialysis initiation, patients with hemoglobin levels < 9.0 g/dL who received ESAs prior to dialysis initiation

|                                                        | HR (95% CI)      |                  |                  |
|--------------------------------------------------------|------------------|------------------|------------------|
|                                                        | 3 Months         | 6 Months         | 12 Months        |
| <b>Study groups</b>                                    |                  |                  |                  |
| 3A*                                                    | 1.00 (reference) | 1.00 (reference) | 1.00 (reference) |
| 4A†                                                    | 2.41 (1.09-5.34) | 3.16 (1.74-5.75) | 2.19 (1.26-3.81) |
| <b>Nephrologist care</b>                               |                  |                  |                  |
| Yes                                                    | 0.99 (0.59-1.66) | 0.89 (0.59-1.33) | 0.70 (0.51-0.98) |
| No                                                     | 1.00 (reference) | 1.00 (reference) | 1.00 (reference) |
| <b>Age, years</b>                                      |                  |                  |                  |
| 66-69                                                  | 1.00 (reference) | 1.00 (reference) | 1.00 (reference) |
| 70-74                                                  | 0.98 (0.47-2.07) | 1.05 (0.57-1.94) | 1.02 (0.62-1.70) |
| 75-79                                                  | 1.02 (0.48-2.16) | 1.25 (0.69-2.29) | 1.25 (0.77-2.04) |
| ≥ 80                                                   | 1.08 (0.54-2.17) | 1.25 (0.70-2.22) | 1.34 (0.84-2.12) |
| <b>Sex</b>                                             |                  |                  |                  |
| Male                                                   | 1.00 (reference) | 1.00 (reference) | 1.00 (reference) |
| Female                                                 | 0.83 (0.51-1.35) | 0.90 (0.61-1.32) | 0.77 (0.56-1.06) |
| <b>Race</b>                                            |                  |                  |                  |
| White                                                  | 1.00 (reference) | 1.00 (reference) | 1.00 (reference) |
| Black                                                  | 1.44 (0.83-2.49) | 0.99 (0.62-1.56) | 0.86 (0.59-1.26) |
| Other                                                  | 1.11 (0.38-3.23) | 0.81 (0.32-2.07) | 0.69 (0.30-1.60) |
| <b>Primary cause of ESRD</b>                           |                  |                  |                  |
| Diabetes                                               | 1.00 (reference) | 1.00 (reference) | 1.00 (reference) |
| Hypertension                                           | 1.49 (0.84-2.66) | 1.20 (0.75-1.91) | 0.91 (0.61-1.35) |
| Glomerulonephritis                                     | 2.80 (1.01-7.80) | 2.08 (0.89-4.87) | 1.32 (0.61-2.87) |
| Other                                                  | 1.36 (0.62-2.98) | 1.22 (0.66-2.25) | 1.14 (0.69-1.86) |
| <b>Length of total baseline hospitalizations, days</b> |                  |                  |                  |
| 0                                                      | 1.00 (reference) | 1.00 (reference) | 1.00 (reference) |
| 1-3                                                    | 2.25 (0.62-8.17) | 2.19 (0.90-5.34) | 1.73 (0.87-3.45) |
| > 3                                                    | 3.23 (1.34-7.77) | 2.36 (1.28-4.36) | 1.99 (1.27-3.13) |
| <b>Comorbid conditions</b>                             |                  |                  |                  |
| Diabetes                                               | 1.50 (0.80-2.83) | 1.41 (0.84-2.36) | 1.25 (0.80-1.93) |
| ASHD                                                   | 0.95 (0.54-1.67) | 1.20 (0.76-1.91) | 1.21 (0.83-1.78) |
| CHF                                                    | 1.04 (0.55-1.95) | 1.55 (0.91-2.63) | 1.43 (0.93-2.20) |
| CVA/TIA                                                | 1.25 (0.75-2.09) | 1.14 (0.76-1.73) | 1.34 (0.96-1.86) |
| PVD                                                    | 1.22 (0.73-2.04) | 0.97 (0.65-1.43) | 1.01 (0.73-1.39) |
| Dysrhythmia                                            | 1.92 (1.11-3.33) | 1.47 (0.96-2.25) | 1.42 (1.01-2.01) |
| Cardiac (other)                                        | 1.36 (0.80-2.31) | 1.33 (0.87-2.04) | 1.49 (1.05-2.13) |
| COPD                                                   | 1.49 (0.91-2.43) | 1.18 (0.80-1.74) | 1.05 (0.76-1.45) |
| GI disease                                             | 1.56 (0.91-2.69) | 1.56 (1.00-2.42) | 1.35 (0.92-1.97) |
| Liver disease                                          | 2.04 (1.11-3.78) | 1.53 (0.90-2.60) | 1.19 (0.74-1.92) |
| Cancer                                                 | 1.86 (1.11-3.11) | 1.78 (1.17-2.71) | 1.54 (1.08-2.20) |

\*Pre-hemodialysis anemia with ESA use, anemia corrected with post-hemodialysis ESA use ( $n = 1208$ ).

†Pre-hemodialysis anemia with ESA use, anemia not corrected with post-hemodialysis ESA use ( $n = 50$ ).

ASHD, atherosclerotic heart disease; CHF, congestive heart failure; CI, confidence interval; COPD, chronic obstructive pulmonary disease; CVA/TIA, cerebrovascular accident/transient ischemic attack; ESRD, end-stage renal disease; GI, gastrointestinal; HR, hazard ratio; PVD, peripheral vascular disease.
