# Supplementary material for: Predialysis anemia management and outcomes following dialysis initiation: A retrospective cohort analysis
Source: PubMed Central journal article supplement (PMC6157862; doi:10.1371/journal.pone.0203767), 2018-09-26

**Fig. S1.** Depiction of dividing patients into four treatment groups, using hemoglobin threshold of 10 g/dL.

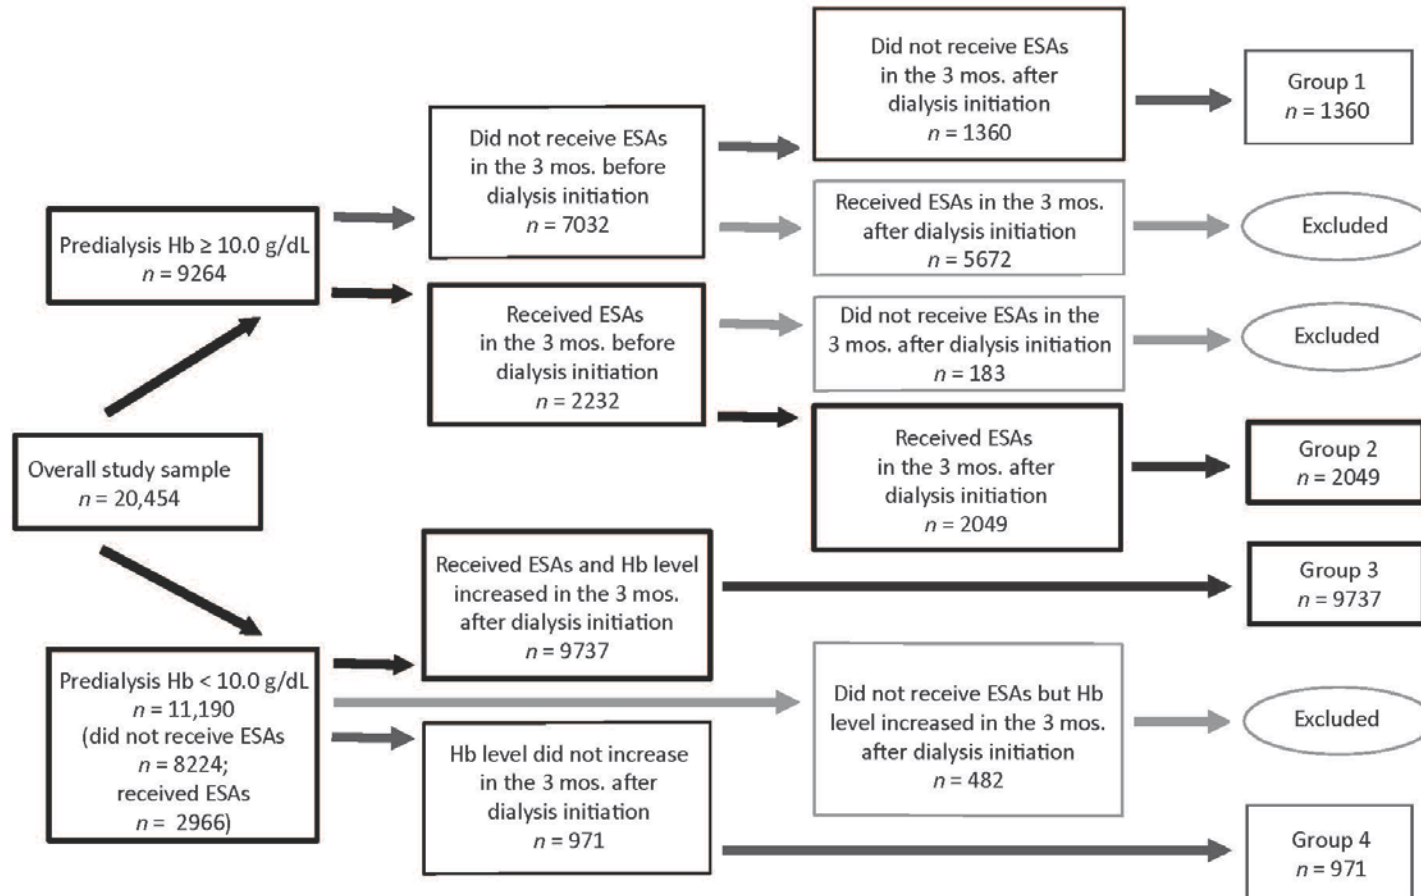

Supplement: pone.0203767.s007.pdf [file pone.0203767.s007.pdf]
